# Supplementary material
Source: PubMed Central journal article supplement (PMC4188986)
Supplement: supp_M114.039156_mcp.M114.039156-1.pdf [file supp_M114.039156_mcp.M114.039156-1.pdf]

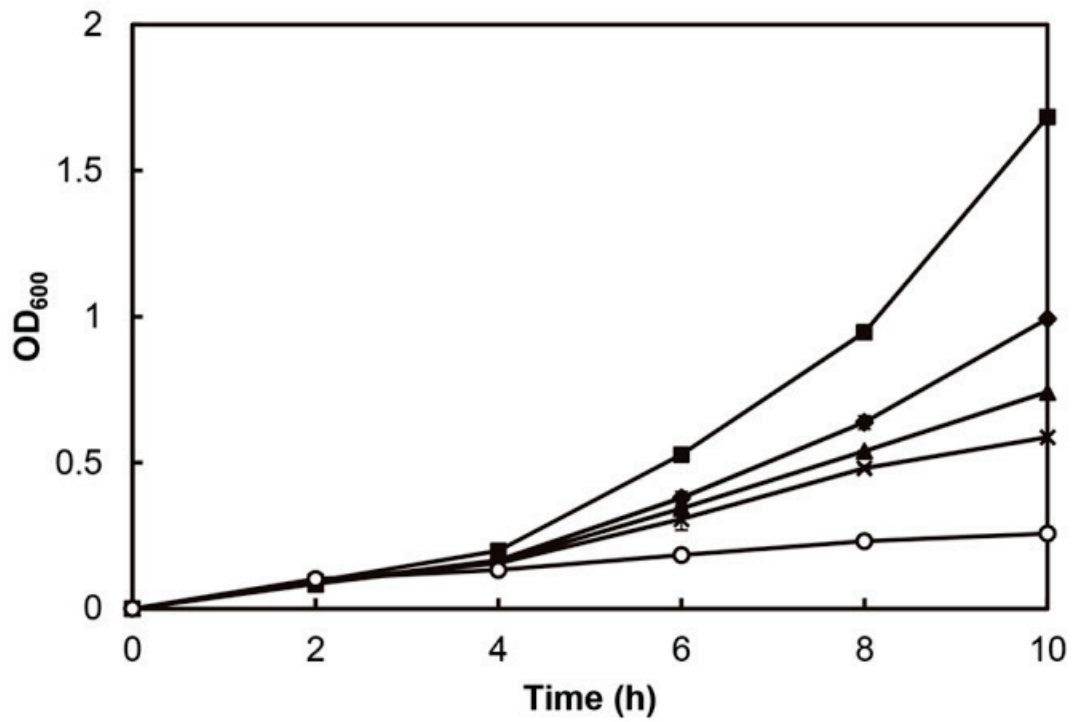

**Fig. S1.** Growth conditions of *B. longum* BBMN68 in the presence of different concentrations of ox-bile: (■) 0, (◆) 0.6, (▲) 0.75, (×) 0.9, (○) 1.2 g l<sup>-1</sup>.
