# Supplementary material
Source: PubMed Central journal article supplement (PMC4188986)
Supplement: supp_M114.039156_mcp.M114.039156-4.pdf [file supp_M114.039156_mcp.M114.039156-4.pdf]

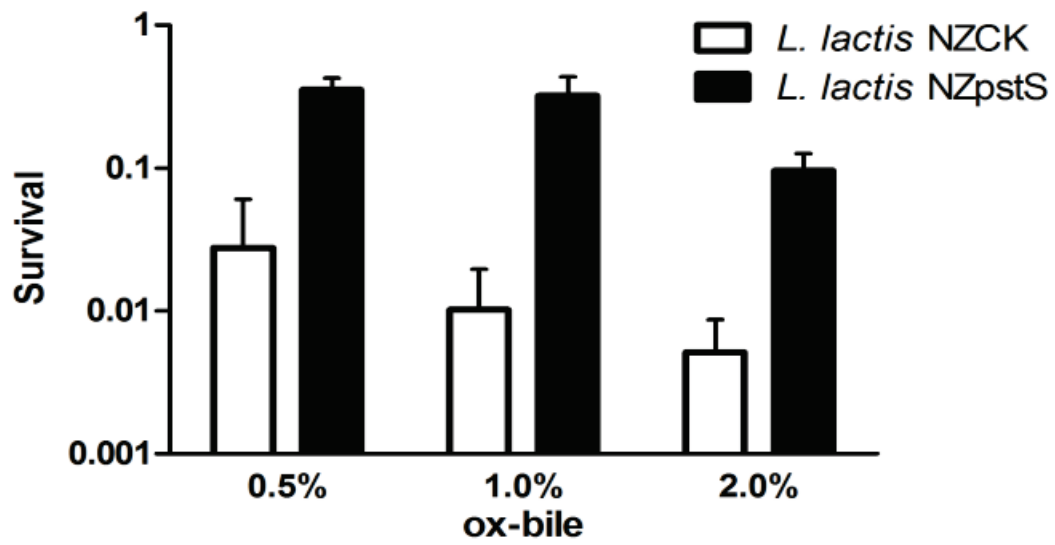

**Fig. S4.** Enhanced bile survival conferred by bifidobacterial *pstS* on *L. lactis* NZ9000. Survival is calculated as the ratio of the number of colonies obtained on GM17 plates after and before different concentrations of ox-bile challenge. Data are mean  $\pm$  standard deviation of three independent experiments.
