# Supplementary material
Source: PubMed Central journal article supplement (PMC4188986)
Supplement: supp_M114.039156_mcp.M114.039156-5.pdf [file supp_M114.039156_mcp.M114.039156-5.pdf]

**Table S1.** Oligonucleotides and primers used in this study

| Oligonucleotide/primer | Sequence (5'-3')                                                                                                          |
|------------------------|---------------------------------------------------------------------------------------------------------------------------|
| Library-F              | <u>CCGGAATTC</u> GGCGCGCCN <sub>(18)</sub> CCGGGTGTACACGCGTTTGAAGAC<br>GAAAGGGCCTCGTGATACGCCTAG <u>GCGGCCGC</u> ATACTACTA |
| Library-R              | TAGTAGTATGCGGC                                                                                                            |
| RegX3-F                | <u>GGGTACC</u> ATGACACGCATTCTTA                                                                                           |
| RegX3-R                | GCTCTAGAAAAGGCGACCCGAAG                                                                                                   |
| RegX3H-F               | CATGCCATGGCAGCATTCTTATCG                                                                                                  |
| RegX3H-R               | CCCAAGCTTAATGATGATGATGATGATGCTCCGCGGGAGTATC<br>GATC                                                                       |
| EMSA pstS-F            | <b>AGTGTT</b> CATCTTCTGTTTACTGATTC <b>GTTTT</b> GGGCCCTTGAAA<br>CCACCAATACGCTTGT <b>AGTTGTC</b> AT                        |
| EMSA pstS-R            | AT <b>GACA</b> ACTACAAGCGTATTGGTGGTTTCAAGGGCCCAAA <b>ACCG</b><br>AAATCAGTAAACAGAAGAT <b>GAACACT</b>                       |
| PstS-F                 | CATGCCATGGAGAAGAATCCTCG                                                                                                   |
| PstS-R                 | <u>GGGTACCT</u> CACTTGGTCTTGATGG                                                                                          |

Restriction enzyme cutting sites are underlined: GAATTC-EcoRI, GCGGCCGC-NotI, GGTACC-KpnI, TCTAGA-XbaI, CCATGG-NcoI, AAGCTT-HindIII.

Boldfaces indicate the predicted binding sites of RegX3.
